*Running Head: Heterogeneity of Irritability*

## **Heterogeneity of Irritability: Psychometrics of The Irritability and Dysregulation of Emotion Scale (TIDES-13).**

Andrew S. Dissanayake<sup>1</sup>; Annie Dupuis, PhD<sup>2</sup>; Paul D. Arnold, MD, PhD<sup>1,3,4</sup>; Christie Burton, PhD<sup>3</sup>; Jennifer Crosbie, PhD<sup>1,3</sup>; Russell J. Schachar, MD<sup>1,3</sup>; Tomer Levy, MD<sup>5,6</sup>

<sup>1</sup>Department of Psychiatry, Hospital for Sick Children, Toronto, ON, Canada, <sup>2</sup>Department of Biostatistics, Dalla Lana School of Public Health, University of Toronto, Canada <sup>3</sup>Department of Psychiatry, Faculty of Medicine, University of Toronto, Canada, <sup>4</sup>The Mathison Centre for Mental Health Research & Education, Department of Child and Adolescent Psychiatry, Shalvata Mental Health Center, Hod Hasharon, Israel<sup>5</sup>, Sackler Faculty of Medicine, Tel Aviv University, Tel Aviv, Israel<sup>6</sup>.

### **Corresponding Author:**

Russell J. Schachar, MD  
Senior Scientist and Staff Psychiatrist  
The Hospital for Sick Children (Neurosciences and Mental Health/Psychiatry)  
Phone: 416.813.7654 ex 206564  
Fax: 416.813.6565  
Email: [russell.schachar@sickkids.ca](mailto:russell.schachar@sickkids.ca)

**Acknowledgements:** This work was supported by the Canadian Institutes of Health Research (R.J.S., MOP-93696 and P.D.A., MOP-106573) and the Alberta Innovates Translational Health Chair in Child and Youth Mental Health (P.D.A.). The statistical expert on the manuscript is Dr. Annie Dupuis.

**Keywords:** Irritability, Heterogeneity, TIDES-13, psychometric properties, scale validation

**Conflict of interest:** None.

1 *Running Head: Heterogeneity of Irritability*

2  
3  
4  
5  
6  
7 **Heterogeneity of Irritability: Psychometrics of The Irritability and Dysregulation of**  
8  
9 **Emotion Scale (TIDES-13).**

10  
11 **ABSTRACT**

12  
13  
14 **Objective.** We designed The Irritability and Dysregulation of Emotion Scale (TIDES-13) to test  
15 whether irritability consisted of several sub-dimensions that would correlate differentially with  
16 internalizing/externalizing psychopathology, age, and gender. **Method.** Parent-report (n = 3935,  
17 mean age = 8.9) and youth self-report (n = 579, mean age = 15.1) versions of TIDES-13 were  
18 administered to a population-based sample. Exploratory and confirmatory factor analyses were  
19 conducted on separate sub-samples. We fit multivariable regression models between TIDES-13  
20 sub-dimensions and age, gender, anxiety, depression, ODD and ADHD trait levels. **Results.** A  
21 higher order model with a global irritability dimension and Proneness to Anger, Internalized  
22 Negative Emotional Reactivity, Externalized Negative Emotional Reactivity and Reactive  
23 Aggression sub-dimensions showed good to excellent fit in both parent-report and self-report.  
24 The global irritability dimension had a strong influence on all item variance ( $\omega_{\text{Hierarchical; parent report}}$   
25 = .94,  $\omega_{\text{Hierarchical; self report}}$  = .90). Proneness to Anger, Externalized Negative Emotional  
26 Reactivity and Reactive Aggression decreased with age in males, whereas Internal Negative  
27 Emotional Reactivity increased with age in females. Internalized Negative Emotional Reactivity  
28 was associated with internalizing traits, over and above global irritability. ODD and ADHD were  
29 predicted primarily by the global irritability. **Conclusion.** Although irritability can be estimated  
30 as an essentially unidimensional construct, differential associations of Internalized Negative  
31 Emotional Reactivity with gender and age, and internalizing psychopathology warrant  
32 examination in clinical populations. These results support TIDES-13 as a reliable and valid

1  
2  
3  
4 multidimensional measure of irritability and thus may be useful for research and clinical  
5  
6 purposes.  
7

## 8 9 INTRODUCTION

10  
11 Irritability is the one of the most common reasons for psychiatric evaluation and  
12 treatment in children and youth.<sup>1,2</sup> Irritability is associated with a wide range of internalizing (eg.  
13 anxiety and depression)<sup>3</sup> and externalizing psychopathology (eg. attention-deficit/hyperactivity  
14 disorder (ADHD)<sup>4</sup> and oppositional defiant disorder (ODD<sup>5</sup>) and predicts significant concurrent  
15 and future impairment (eg. academic problems, poverty, and suicidality).<sup>6,7</sup> Despite its  
16 importance, there is a lack of consensus on how to best conceptualize and measure irritability.<sup>8</sup>  
17 This difficulty arises because irritability may manifest through a wide range of emotions,  
18 behaviors and internal states.<sup>9</sup> For example, irritability may encompass excessive reaction to  
19 external (e.g., auditory stimulus, external cognitive distraction) or internal stimuli (e.g., fatigue  
20 or hunger) with negative emotions (ie. negative emotional reactivity),<sup>10-12</sup> proneness to anger  
21 outbursts (i.e., “phasic irritability”), persistent irritable moods (i.e, tonic irritability),<sup>13</sup> low  
22 tolerance for frustration in the face of blocked goal attainment (i.e., frustration intolerance),<sup>14,15</sup>  
23 and a low threshold for maladaptive responses to threat with reactive aggression.<sup>11,16</sup>  
24  
25  
26  
27  
28  
29  
30  
31  
32  
33  
34  
35  
36  
37  
38  
39  
40  
41  
42

43 Existing measures focus on a subset of possible manifestations of irritability, treating the  
44 construct as a homogeneous or unidimensional construct rather than a heterogeneous or  
45 multidimensional concept obscuring the possibility that sub-dimensions of irritability may exist  
46 and have distinct correlates. For example, the Affective Reactivity Index (ARI), a widely-used  
47 six item irritability scale in children and youth, primarily includes items that center on  
48 expressions of anger<sup>17</sup> (ie. “stays angry for a long time”, “is angry most of the time”, “gets angry  
49 frequently”). On the other hand, the Bite Scale includes only items pertaining to an internal  
50  
51  
52  
53  
54  
55  
56  
57  
58  
59  
60  
61  
62  
63  
64  
65

1  
2  
3  
4 enduring state, alternatively characterized as tonic irritability<sup>18,19</sup> (ie. “I have been grumpy, other  
5 people have been getting on my nerves”, “Things have been bothering me more than they  
6 normally do”, “I have been feeling irritable”). Despite these unidimensional conceptualizations,  
7 there is growing evidence for the hypothesis that irritability is a multidimensional trait with sub-  
8 dimensions that represent different states, emotions and behaviors.<sup>19–22</sup> Thus, a measure that  
9 encompasses the variable sub-dimensions of irritability with strong internal reliability and  
10 discriminant validity would be an asset to clinical practice and scientific research progress.<sup>8,9,17</sup>

11  
12  
13  
14  
15  
16  
17  
18  
19  
20  
21 Prior to this study, we developed The Irritability and Dysregulation of Emotion Scale  
22 (TIDES-13) to measure a wide range of theoretical manifestations of the construct including  
23 proneness to anger (i.e., tonic irritability),<sup>16</sup> anger outbursts (i.e., phasic irritability),<sup>10 12,18</sup>  
24 negative emotional reactivity,<sup>12</sup> and frustration intolerance<sup>13</sup> (see supplementary materials). This  
25 present study assessed whether TIDES-13 captured a unified construct corresponding to  
26 irritability, as described previously in the literature, or whether irritability consists of sub-  
27 dimensions with distinct correlates. Using data from a large community sample, we used  
28 exploratory and confirmatory factor analyses to determine whether multiple irritability sub-  
29 dimensions could be discerned. Finally, we assessed the predictive validity of irritability sub-  
30 dimensions by examining their differential associations with age, gender, internalizing  
31 psychopathology and externalizing psychopathology.<sup>19–22</sup> We also tested the hypothesis that a  
32 sub-dimension pertaining to anger would show the strongest levels of convergence with the ARI,  
33 given that the ARI mainly measures proneness to anger.<sup>8</sup>

## 34 35 36 37 38 39 40 41 42 43 44 45 46 47 48 49 50 51 52 53 54 55 56 57 58 59 60 61 62 63 64 65

Methods for Scale Development are described in the supplement.

## Participants

Visitors aged 4-19 years to a local science center (N = 4413) participated in this study in 2019. Sample characteristics are presented in Table 1. Parents were the informants for participants ages 4 to 19 (N = 3880); participants aged 10-19 (N = 533) provided self-report.

## Ethical considerations

Informed consent, and verbal assent when applicable, were obtained from all participants, as approved by the local institution's ethics review board.

## Predictive Validity

To assess the predictive validity of irritability sub-dimensions, a subsets of parents and youth completed the ARI (parent: N = 802; self: N = 77), as well as measures of ADHD (parent: N = 3867; self: N = 516) ODD (parent: N = 1256; self: N = 54), anxiety (parent: N = 1554, self: N = 109) and depression (parent: N = 1555; self: N = 109) traits. Anxiety and Depression traits were measured by summing the 6 item depression subscale and the 10 item subscale of the Revised Children's Anxiety and Depression Scale-25 (RCADS).<sup>23</sup> ADHD and ODD traits were measured by summing the 18 ADHD items and the 8 ODD items, respectively, in the Strength and Weakness of ADHD and Normal behavior scale (SWAN).<sup>24</sup> SWAN scores were reversed so that higher scores reflected higher levels of the trait for consistency with the other measures.

## Statistical Analyses

To evaluate TIDES-13's dimensionality, we randomly split the parent-report data into an exploratory factor analysis (EFA) sample (N = 1937) and a confirmatory factor analysis sample (CFA; N = 1938). The self-report sample (N = 516) was used entirely for CFA. Detailed

1  
2  
3  
4 procedure for the EFA can be found in the supplemental materials. In CFA, we used a robust  
5  
6 maximum likelihood estimator (MLR) due to moderate violations to multivariate normality, as  
7  
8 indicated by visual examinations of the Chi-Squared Q-Q plot. Model fit was assessed based on  
9  
10 the following fit indices: Comparative Fit index (CFI;.95 and above indicate excellent fit  
11  
12 whereas .90-0.95 indicate acceptable fit), the Tucker Lewis Index (TLI; values above .95  
13  
14 indicate excellent fit whereas .90-.95 indicate acceptable fit), the root means square error of  
15  
16 approximation (RMSEA; values smaller than .08 indicate acceptable fit), and the standardized  
17  
18 root mean square residual (SRMR; recommended cut-off at .08).<sup>25</sup> We additionally tested the fit  
19  
20 of multiple higher order models with a single higher order global dimension and the sub-  
21  
22 dimensions extracted from EFA to assess the degree to which the sub-dimensions of irritability,  
23  
24 in fact, contributed to a single underlying construct. To compare the relative contributions of a  
25  
26 higher order global dimension versus each sub-dimension to the item's variance, we performed  
27  
28 Schmid-Leiman transformations<sup>26</sup> to the best fitting higher order model, which enabled variance  
29  
30 partitioning between global dimensions and the sub-dimensions. We also used the standardized  
31  
32 loadings from the Schmid-Leiman transformations to calculate indices of internal consistency  
33  
34 reliability (ie. the proportion of variance in the calculated score attributed to the construct of  
35  
36 interest).<sup>27</sup> We calculated omega total, omega hierarchical ( $\omega_h$ ), and omega sub-dimension.  
37  
38 Omega total estimates the proportion of variance of a total score attributable to all sources of  
39  
40 common variance, where a high omega value reflects a highly reliable multidimensional  
41  
42 composite.<sup>28</sup>  $\omega_h$  represents the proportion of variance attributable to a common factor and is a  
43  
44 measure of general factor saturation,<sup>28</sup> where a high  $\omega_h$  indicates that the general factor is a  
45  
46 dominant source of test score variance.<sup>29</sup> Omega sub-dimension represents the internal  
47  
48 consistency reliability of each sub-dimension score to measure the corresponding sub-dimension,  
49  
50  
51  
52  
53  
54  
55  
56  
57  
58  
59  
60  
61  
62  
63  
64  
65

1  
2  
3  
4 over and above the global construct.<sup>30</sup> Each omega value can range from 0 (no reliability) to 1  
5  
6 (perfect reliability). CFA models were fitted using lavaan<sup>31</sup> and the Schmid-leimen  
7  
8 transformation and omega values were calculated using EFAtools.<sup>32</sup> Both packages are freely  
9  
10 available in R Studio.  
11  
12

13  
14 Multivariable regression models were fit to examine associations of TIDES-13 sub-  
15  
16 dimensions with age and gender. Age by gender interactions were also examined, and a  
17  
18 subsequent gender-stratified analysis was performed when the interaction term was significant.  
19  
20 Parent and self-report data were combined to examine the associations between irritability and  
21  
22 age along the full age continuum (ie. 4-19 yrs), with adjustment for respondent.  
23  
24

25  
26 We evaluated the associations of each TIDES sub-dimension with anxiety, depression,  
27  
28 ADHD and ODD traits by first calculating the Pearson correlations between each trait measure  
29  
30 and each TIDES-13 sub-dimension in the subsample of participants with both measures  
31  
32 available. We compared the TIDES-13 sub-dimensions correlation between other outcome  
33  
34 variables and other sub-dimensions using Hitner's, May and Silver's method for comparing  
35  
36 dependent correlations.<sup>33</sup> We then fit multivariable regression models for each outcome with  
37  
38 each TIDES sub-dimension as a predictor, adjusting for covariates such as age and gender.  
39  
40 Parent-reported outcomes were predicted by parent-reported variables; self-reported outcomes  
41  
42 were predicted by self-reported variables. To test the degree to which associations were driven  
43  
44 by variance unique to specific sub-dimensions or rather by shared variance between each sub-  
45  
46 dimension (i.e., the global factor), we performed a regression commonality analysis.<sup>34</sup> Variance  
47  
48 inflation factors (VIF) were also calculated to ensure the results were not severely degraded by  
49  
50 multicollinearity. VIF's under 10 were considered acceptable with no severe violations.<sup>35</sup>  
51  
52  
53 Statistical significance was considered at  $p < .05$  for all analyses.  
54  
55  
56  
57  
58  
59  
60  
61  
62  
63  
64  
65

## RESULTS

### Dimensionality

EFA and CFA revealed a four-dimension model with dimensions corresponding to Proneness to Anger (P. Anger), Reactive Aggression (R. Aggression), externalized negative emotional reactivity (Ext. Reactivity), and internalized negative emotional reactivity (Int. Reactivity) fit the data best in both parent-report and self-report. However, as model selection based fit statistics is generally unadvisable,<sup>30</sup> we further examined the corresponding higher order model with the same four dimensions as sub-dimensions and an additional higher order global irritability (IRRIT) dimension (Figure 1) due to the moderate to high inter-dimension correlations (Table 2). This higher order model showed excellent fit in parent-report data ( $CFI_{parent} = .973$ ,  $TLI_{parent} = .965$ ,  $RMSEA_{parent} = .76$ ,  $SRMR = .027$ ) and self-report data ( $CFI_{self} = .971$ ,  $TLI_{self} = .944$ ,  $RMSEA_{self} = .78$ ,  $SRMR = .044$ ). The loadings of the higher order model with four sub-dimensions (Figure 1) revealed that each item influenced its corresponding sub-dimension ( $\lambda_{parent} > .74$ ; Median  $\lambda_{parent} = .88$ ;  $\lambda_{self} > .61$ ; Median  $\lambda_{self} = .82$ ), indicating that the sub-dimensions were well defined.

The loadings of the sub-dimensions onto the global irritability dimension (from  $\lambda_{parent} = .86$  (R. Aggression) to  $\lambda_{parent} = .98$  (P. Anger); from  $\lambda_{self} = .85$  (R. Aggression) to  $\lambda_{self} = .96$  (P. Anger) demonstrated that each the sub-dimension was strongly influenced by IRRIT (Figure 1). The high standardized loadings from the Schmid-Leiman transformation of the higher order four sub-dimension model (Table 3) also suggested a strong underlying global irritability dimension. The median of the standardized item loadings on IRRIT was  $\lambda = .81$  (range:  $\lambda = .72$  to  $\lambda = .92$ ) in



1  
2  
3  
4 parent report and  $\lambda = .72$  (range:  $\lambda = .58$  to  $\lambda = .87$ ) in self-report. However, each item also had  
5  
6 consistent non-negligible loadings onto its corresponding sub-dimensions (Median  $\lambda_{\text{parent}} = .24$ ;  
7  
8 range: from  $\lambda_{\text{parent}} = .18$  to  $\lambda_{\text{parent}} = .46$ ; Median  $\lambda_{\text{self}} = .24$ ; range: from  $\lambda_{\text{self}} = .24$  to  $\lambda_{\text{self}} = .46$ ) which  
9  
10 suggested that the sub-dimensions had incremental impact on the corresponding item scores over  
11  
12 and above IRRIT. Descriptions of all models that were extracted in EFA and compared in CFA,  
13  
14 along with their respective fit indices, can be found in the supplemental materials along with  
15  
16 their respective fit indices in Table S1.  
17  
18  
19  
20

21 Model-based omega estimates suggested that IRRIT had excellent internal consistency  
22  
23 reliability and contributed to a large proportion of the total variance of all the items (Table 3). All  
24  
25 estimated omega values can be found in Table 3. The  $\omega_{\text{h}}$  values for each sub-dimension were  
26  
27 satisfactory to excellent (Median  $\omega_{\text{H parent}} = .81$ ; range: from  $\omega_{\text{H parent}} = .67$  (R. Aggression) to  $\omega_{\text{H}}$   
28  
29  $\text{parent} = .89$  (P. Anger); Median  $\omega_{\text{H self}} = .68$ ; range:  $\omega_{\text{H self}} = .63$  to  $\omega_{\text{H self}} = .81$ ). The  $\omega_{\text{h}}$  value  
30  
31 corresponding to IRRIT was very high in parent report ( $\omega_{\text{H}} = .94$ ) and self report ( $\omega_{\text{H}} = .90$ )  
32  
33 suggesting a strong underlying global factor. Correspondingly, the omega sub-dimension values  
34  
35 for the sub-dimensions were low (Median  $\omega_{\text{parent}} = .11$ ; range:  $\omega_{\text{parent}} = .04$  to  $\omega_{\text{parent}} = .25$ ; Median  
36  
37  $\omega_{\text{self}} = .14$ ; range:  $\omega_{\text{self}} = 0.08$  to  $\omega_{\text{self}} = .24$ ), further confirming that a large proportion of the  
38  
39 reliable variance was captured by IRRIT  
40  
41  
42  
43  
44  
45  
46  
47

### 48 **Predictive Validity of TIDES-13 sub-dimensions**

49

50 In multivariable regression models examining age and gender effects, the age by gender  
51  
52 interaction terms were significant for each sub-dimension. In subsequent gender stratified  
53  
54 analyses, IRRIT, P. Anger, Ext. Reactivity and R. Aggression decreased with age in males but  
55  
56  
57  
58  
59  
60  
61  
62  
63  
64  
65

1  
2  
3  
4 showed no significant associations with age in females whereas Int. Reactivity increased with  
5  
6 age in females but showed no significant associations with age in males (Table S2).  
7

8  
9 In parent- and self-report, Int. Reactivity was significantly more correlated with anxiety  
10 traits than all the other TIDES-13 sub-dimensions (Table 2): P. Anger (parent:  $z = 6.47$ ,  $p < .001$ ;  
11 self:  $z = 3.53$ ,  $p < .001$ ), Ext. Reactivity (parent:  $z = 3.38$ ,  $p < .001$ ; self:  $z = 2.3$ ,  $p = .021$ ), and  
12 R. Aggression (parent:  $z = 5.58$ ,  $p < 0.001$ ; self:  $z = 2.55$ ,  $p = .011$ ). Similarly, parent reported  
13 Int. Reactivity was also significantly more correlated with depression traits than all the other sub-  
14 dimensions (Table 2): P. Anger ( $z = 5.74$ ,  $p < .001$ ), Ext. Reactivity ( $z = 3.86$ ,  $p < 0.001$ ) and R.  
15 Aggression ( $z = 5.23$ ,  $p < .001$ ). Self-reported Int. Reactivity was significantly more correlated  
16 with depression traits than P. Anger ( $z = 2.64$ ,  $p = .008$ ) and R. Aggression ( $z = 2.37$ ,  $p = .018$ )  
17 but no significant differences were found when compared to the correlation between depression  
18 traits and Ext. Reactivity ( $z = 1.69$ ,  $p = .092$ ).  
19  
20  
21  
22  
23  
24  
25  
26  
27  
28  
29  
30  
31  
32

33 As expected, P. Anger had the highest correlation with the ARI (Table 2). Parent-  
34 reported P. Anger was significantly more correlated with the ARI than Ext. Reactivity ( $z = 3.7$ ,  $p$   
35  $< .001$ ) and R. Aggression ( $z = 4.56$ ,  $p < .001$ ) however, no significant difference was found  
36 between the correlation of the ARI and P. Anger, and the correlation of the ARI and Int.  
37 Reactivity ( $z = 1.36$ ,  $p = .174$ ). Self-reported P. Anger was significantly more correlated with the  
38 ARI than Ext. Reactivity was ( $z = 1.20$ ,  $p = .048$ ), but no significant differences were found  
39 when comparing the correlation of the ARI and P. Anger to the correlation of the ARI and Int.  
40 Reactivity ( $z = 0.31$ ,  $p = .757$ ) and the correlation of the ARI and R. Aggression ( $z = 0.06$ ,  $p =$   
41  $.952$ ).  
42  
43  
44  
45  
46  
47  
48  
49  
50  
51  
52  
53  
54

55 Parent-reported P. Anger was significantly more correlated with ODD traits than Int.  
56 Reactivity ( $z = 5.79$ ), Ext. Reactivity ( $z = 3.2$ ,  $p = .0013$ ) and R. Aggression ( $z = 3.40$ ,  $p =$   
57  
58  
59  
60  
61  
62  
63  
64  
65

1  
2  
3  
4 .0007). In self-report, although, R. Aggression had the greatest correlation with ODD traits, it  
5  
6 was not significantly greater than the correlations between ODD traits and the other sub-  
7  
8 dimensions  
9

10  
11 In multivariable regression models, Int. Reactivity was the strongest significant predictor  
12  
13 (i.e., largest beta coefficient) of anxiety and depression (Table 4). A similar trend was seen in  
14  
15 self-report, where Int. Reactivity was the sole significant predictor of anxiety and depression  
16  
17 traits (Table 4). Further commonality analysis revealed that in parent report data, Int. Reactivity  
18  
19 uniquely explained 31.1% and 23.9% of the total variance explained by the regression models  
20  
21 predicting anxiety and depression traits respectively, whereas 41.5% and 54.4% of the variance  
22  
23 explained was shared by all sub-dimensions. These results suggest IRRIT explains a substantial  
24  
25 portion of the anxiety and depression trait variance, however, Int. Reactivity is uniquely  
26  
27 associated with internalizing traits, over and above the associations of IRRIT. In self-report data,  
28  
29 surprisingly, a greater proportion of the variance of anxiety and depression traits was uniquely  
30  
31 explained by Int. Reactivity (77.8% and 78.3% respectively) than the variance explained by  
32  
33 IRRIT (14.4% and 11.4% respectively), suggesting that Int. Reactivity primarily predicted  
34  
35 internalizing traits, even more so than IRRIT.  
36  
37  
38  
39  
40  
41  
42

43 In multivariable regression models, parent reported P. Anger was the strongest predictor  
44  
45 of ODD traits; however, substantially more of the variance explained by the model was shared  
46  
47 by all sub-dimensions (60.4%) than what was uniquely explained by P. Anger (6.9%). In self-  
48  
49 reported data, no sub-dimensions were significant predictors, however, there a limited number of  
50  
51 self-report participants who had completed both the TIDES-13 and the ODD subscale (n = 54).  
52  
53  
54  
55  
56  
57  
58  
59  
60  
61  
62  
63  
64  
65

1  
2  
3  
4 All sub-dimensions were similarly correlated with ADHD traits and had overlapping  
5  
6 confidence intervals (Table 2). In regression models (Table 4), a majority of the variance  
7  
8 explained was explained by IRRIT (parent report: % shared = 61.7, self report: % shared = 48.8).  
9  
10

## 11 12 13 14 **DISCUSSION**

15  
16 This article examined the heterogeneity of irritability symptoms in a large community  
17  
18 sample using TIDES-13, a novel scale designed to capture various expressions of irritability. Our  
19  
20 first aim was to use exploratory and confirmatory factor analyses to see if irritability sub-  
21  
22 dimensions could be discerned. Our results lend further support to the notion that irritability is a  
23  
24 heterogeneous construct with highly interrelated, yet distinct, ways of manifesting. We identified  
25  
26 highly correlated, but distinguishable sub-dimensions that showed excellent fit across  
27  
28 respondents (parent vs self): P. Anger, R. Aggression, Int. Reactivity, and Ext. Reactivity. Three  
29  
30 of these sub-dimensions aligned with our hypothesis that dimensions relating to proneness to  
31  
32 anger, reactive aggression, and internal affective state (Int. Reactivity) would emerge. However,  
33  
34 within the remaining items, an external (Ext. Reactivity) response to stimuli also emerged.  
35  
36  
37  
38  
39  
40  
41  
42

43 The empirical distinction between P. Anger, characterized by anger outbursts, and Int.  
44  
45 Reactivity, an internal persistent state, within our results aligns with the a priori differentiation  
46  
47 between phasic (i.e., severe and developmentally inappropriate anger outbursts) and tonic (ie.  
48  
49 persistent irritable mood between outbursts) irritability. The separation of these two sub-  
50  
51 dimensions is also consistent with recent empirical findings that suggest phasic and tonic  
52  
53 irritability are distinct, yet highly related irritability dimensions.<sup>19,21</sup>  
54  
55  
56  
57  
58  
59  
60  
61  
62  
63  
64  
65

1  
2  
3  
4 The emergence of reactive aggression sub-dimension within our results is also important  
5  
6 given the debate on whether notions of irritability should include behavioral aspects such as  
7  
8 aggression. The result from our higher order modeling reveals that R. Aggression loaded onto the  
9  
10 global factor (IRRIT) to a similar extent as other irritability sub-dimensions. This supports the  
11  
12 conceptualization of R. Aggression as a distinguishable behavioral manifestation of irritability.  
13  
14  
15  
16  
17  
18

19 Given the calls for more nuanced irritability measures that are better able to differentiate  
20  
21 irritability-related constructs such as tonic and phasic irritability from each other,<sup>19</sup> having P.  
22  
23 Anger, R. Aggression, Int. Reactivity, and Ext. Reactivity sub-dimensions within a measure of  
24  
25 irritability may enable more nuanced explorations of the construct's phenomenology. However,  
26  
27 we also found a high degree of unity within the isolated sub-dimensions, which may explain why  
28  
29 irritable sub-dimensions have been so difficult to distinguish previously. We observed that P.  
30  
31 Anger, R. Aggression, Int. Reactivity, and Ext. Reactivity showed high degrees of  
32  
33 interrelatedness and loaded strongly onto a global dimension (IRRIT) with high internal  
34  
35 reliability. Furthermore, when evaluating the association of sub-dimensions with other forms of  
36  
37 psychopathology, we saw that ADHD and ODD traits were driven primarily by IRRIT rather  
38  
39 than individual sub-dimensions. We also observed high  $\omega_h$  values of IRRIT (.94 and .90)  
40  
41 suggesting that much of the item variance was driven by one underlying factor. These findings  
42  
43 are consistent with studies conducted in a general population that suggest irritability sub-  
44  
45 dimensions show high levels of inter-relatedness in normative samples.<sup>13</sup> Paired with our  
46  
47 findings, these studies suggest that within a normative sample, irritability can be considered  
48  
49 essentially unidimensional implying the existence of a unique unidimensional latent trait in the  
50  
51 presence of minor sub-dimensions.<sup>36</sup> In light of these findings, we suggest that investigators  
52  
53  
54  
55  
56  
57  
58  
59  
60  
61  
62  
63  
64  
65

1  
2  
3  
4 using TIDES-13 to measure irritability in normative samples may utilize a total score as a valid  
5  
6 and reliable measure of global irritability.  
7  
8  
9

10  
11         However, these results do not invalidate the potential of measuring irritability through  
12 sub-dimensions. Our results indicated that measuring irritability sub-dimensions provides  
13  
14 additional information beyond irritability in general. We observed that Int. Reactivity increased  
15  
16 with age in females and showed no association with age in males, contrary to the other sub-  
17  
18 dimensions which decreased with age in males and showed no association in females. We also  
19  
20 observed that Int. Reactivity was also uniquely associated with internalizing traits alluding to its  
21  
22 discriminant validity. This differential association is consistent with work that suggests that  
23  
24 mood-related irritability items predict depression in early adulthood over and above oppositional  
25  
26 defiant dimension related items,<sup>20</sup> lending support to the Int. Reactivity's predictive validity.  
27  
28  
29 Given the emerging consensus that irritability in children is a longitudinal predictor of anxiety  
30  
31 and depression,<sup>3</sup> further examination of the longitudinal associations with TIDES-13 sub-  
32  
33 dimensions may also yield a better understanding of whether these associations are primarily  
34  
35 driven by specific sub-dimensions of irritability. Furthermore, recent evidence suggests that  
36  
37 different subtypes of irritability with different developmental trajectories may exist.<sup>22,37</sup> One of  
38  
39 these isolated subtypes showed an increasing association with age and female preponderance  
40  
41 similar to Int. Reactivity's associations with age/gender, whereas other irritability subtypes show  
42  
43 male preponderance and an inverse association with age, similar to the cross sectional trend  
44  
45 observed in the remaining TIDES sub-dimensions.<sup>22</sup> However, developmental studies often  
46  
47 utilize overall irritability scores, combining items from the different potential sub-dimensions of  
48  
49  
50  
51  
52  
53  
54  
55  
56  
57  
58  
59  
60  
61  
62  
63  
64  
65

1  
2  
3  
4 irritability obscuring the possibility that these subtypes are driven by particular irritability sub-  
5  
6 dimensions.

7  
8  
9 We also found that parent-reported P. Anger was more strongly correlated with the ARI  
10 than most other sub-dimensions confirming that ARI items tend to reflect proneness to anger.  
11  
12 However, it should be noted that although the magnitude of correlation coefficients in self-report  
13 suggested a similar trend, many of the comparisons of correlation coefficients in self report were  
14 non-significant. This could be partially due to the limited power available due to the small subset  
15 of self respondents who completed both the ARI and TIDES-13 (N = 73). Also, in the parent  
16 report, the differences in correlation coefficients between P. Anger and the ARI and Int.  
17 Reactivity and the ARI were non-significant. This may be due to the ARI's item content as five  
18 of the items relate to P. Anger, and one item taps into Int. Reactivity (i.e., "easily annoyed").  
19 Further examination of the differences between P. Anger and Int. Reactivity may bring clarity as  
20 to whether any differences between the two constructs are being masked by combining into a  
21 single dimension within existing measures.  
22  
23  
24  
25  
26  
27  
28  
29  
30  
31  
32  
33  
34  
35  
36  
37  
38  
39  
40

41 There are some limitations of this study that should be noted. The study sample was  
42 population-based, and thus the number of participants with mental-health diagnoses was  
43 proportional to that in a general population. However, an irritability scale with variable sub-  
44 dimensions such as TIDES-13 would enable evaluations of the factor structure in different  
45 clinical populations. Future validation studies for TIDES-13 should aim to replicate the factor  
46 structure and cross-sectional associations in clinical samples so that differences between  
47 irritability sub-dimensions can be further explored. The cross-sectional nature of our results also  
48 limited inferences about the stability and long-term predictive validity of irritability factor  
49  
50  
51  
52  
53  
54  
55  
56  
57  
58  
59  
60  
61  
62  
63  
64  
65

1  
2  
3  
4 structure found in the current study. Given the available data, we were only able to assess  
5  
6 TIDES-13's internal reliability. Future studies should administer TIDES to multiple raters across  
7  
8 different respondents and different time points to examine the scale's test-retest and inter-rater  
9  
10 reliability.  
11  
12

## 13 14 **CONCLUSIONS**

15  
16 In a large general population sample with both self and parent report measures, we found  
17  
18 unity and diversity between irritability sub-dimensions. Irritability can manifest variably as  
19  
20 highly interrelated sub-dimensions P. Anger, Int. Reactivity, Ext. Reactivity and R. Aggression  
21  
22 with distinct correlates of psychopathology. These results support TIDES-13 as a reliable and  
23  
24 valid measure which captures a broader spectrum of the construct's phenotype and thus may be  
25  
26 useful for research or clinical purposes. We specifically underscore a need to further examine the  
27  
28 hypothesis that the association between irritability and internalizing psychopathology may be  
29  
30 primarily driven by Int. Reactivity.  
31  
32  
33  
34  
35  
36  
37  
38  
39  
40  
41  
42  
43  
44  
45  
46  
47  
48  
49  
50  
51  
52  
53  
54  
55  
56  
57  
58  
59  
60  
61  
62  
63  
64  
65



## References

1. Peterson BS, Zhang H, Santa Lucia R, King RA, Lewis M. Risk factors for presenting problems in child psychiatric emergencies. *J Am Acad Child Adolesc Psychiatry*. 1996;35(9):1162-1173. doi:10.1097/00004583-199609000-00014
2. Stringaris A, Vidal-Ribas P, Brotman MA, Leibenluft E. Practitioner Review: Definition, recognition, and treatment challenges of irritability in young people. *J Child Psychol Psychiatry*. 2018;59(7):721-739. doi:10.1111/jcpp.12823
3. Vidal-Ribas P, Brotman MA, Valdivieso I, Leibenluft E, Stringaris A. The Status of Irritability in Psychiatry: A Conceptual and Quantitative Review. *J Am Acad Child Adolesc Psychiatry*. 2016;55(7):556-570. doi:10.1016/j.jaac.2016.04.014
4. Eyre O, Langley K, Stringaris A, Leibenluft E, Collishaw S, Thapar A. Irritability in ADHD: Associations with depression liability. *J Affect Disord*. 2017;215:281-287. doi:10.1016/j.jad.2017.03.050
5. Burke JD, Boylan K, Rowe R, et al. Identifying the Irritability Dimension of ODD: Application of a Modified Bifactor Model Across Five Large Community Samples of Children. *J Abnorm Psychol*. 2014;123(4):841-851. doi:10.1037/a0037898
6. Copeland WE, Shanahan L, Egger H, Angold A, Costello EJ. Adult diagnostic and functional outcomes of DSM-5 disruptive mood dysregulation disorder. *Am J Psychiatry*. 2014;171(6):668-674. doi:10.1176/appi.ajp.2014.13091213
7. Conner KR, Meldrum S, Wiecek WF, Duberstein PR, Welte JW. The association of irritability and impulsivity with suicidal ideation among 15- to 20-year-old males. *Suicide Life Threat Behav*. 2004;34(4):363-373. doi:10.1521/suli.34.4.363.53745
8. Toohey MJ, DiGiuseppe R. Defining and measuring irritability: Construct clarification and differentiation. *Clin Psychol Rev*. 2017;53:93-108. doi:10.1016/j.cpr.2017.01.009
9. Malhi G, Bell E, Outhred T. Getting irritable about irritability? *Evid Based Ment Health*. 2019;22(3):93-94. doi:10.1136/ebmental-2019-300101
10. Caprara GV, Cinanni V, D'Imperio G, Passerini S, Renzi P, Travaglia G. Indicators of impulsive aggression: Present status of research on irritability and emotional susceptibility scales. *Personal Individ Differ*. 1985;6(6):665-674. doi:10.1016/0191-8869(85)90077-7
11. Leibenluft E, Stoddard J. The developmental psychopathology of irritability. *Dev Psychopathol*. 2013;25(4 Pt 2):1473-1487. doi:10.1017/S0954579413000722
12. Rabinowitz JA, Osigwe I, Drabick DAG, Reynolds MD. Negative emotional reactivity moderates the relations between family cohesion and internalizing and externalizing

- 1  
2  
3  
4 symptoms in adolescence. *J Adolesc.* 2016;53:116-126.  
5 doi:10.1016/j.adolescence.2016.09.007  
6  
7  
8 13. Copeland WE, Brotman MA, Costello EJ. Normative Irritability in Youth: Developmental  
9 Findings From the Great Smoky Mountain Study. *J Am Acad Child Adolesc Psychiatry.*  
10 2015;54(8):635-642. doi:10.1016/j.jaac.2015.05.008  
11  
12 14. Amsel A. The role of frustrative nonreward in noncontinuous reward situations. *Psychol*  
13 *Bull.* 1958;55(2):102-119. doi:10.1037/h0043125  
14  
15 15. Insel T, Cuthbert B, Garvey M, et al. Research Domain Criteria (RDoC): Toward a New  
16 Classification Framework for Research on Mental Disorders. *Am J Psychiatry.*  
17 2010;167(7):748-751. doi:10.1176/appi.ajp.2010.09091379  
18  
19 16. Leibenluft E. Pediatric irritability: A systems neuroscience approach. *Trends Cogn Sci.*  
20 2017;21(4):277-289. doi:10.1016/j.tics.2017.02.002  
21  
22 17. Stringaris A, Goodman R, Ferdinando S, et al. The Affective Reactivity Index: a concise  
23 irritability scale for clinical and research settings. *J Child Psychol Psychiatry.*  
24 2012;53(11):1109-1117. doi:10.1111/j.1469-7610.2012.02561.x  
25  
26 18. Holtzman S, O'Connor BP, Barata PC, Stewart DE. The Brief Irritability Test (BITe): A  
27 Measure of Irritability for Use Among Men and Women. *Assessment.* 2015;22(1):101-115.  
28 doi:10.1177/1073191114533814  
29  
30 19. Cardinale EM, Freitag GF, Brotman MA, Pine DS, Leibenluft E, Kircanski K. Phasic  
31 Versus Tonic Irritability: Differential Associations With Attention-Deficit/Hyperactivity  
32 Disorder Symptoms. *J Am Acad Child Adolesc Psychiatry.* Published online January 10,  
33 2021. doi:10.1016/j.jaac.2020.11.022  
34  
35 20. Hawes MT, Carlson GA, Finsaas MC, Olinio TM, Seely JR, Klein DN. Dimensions of  
36 irritability in adolescents: longitudinal associations with psychopathology in adulthood.  
37 *Psychol Med.* Published online October 2019:1-9. doi:10.1017/S0033291719002903  
38  
39 21. Silver J, Carlson GA, Olinio TM, et al. Differential outcomes of tonic and phasic irritability  
40 in adolescent girls. *J Child Psychol Psychiatry.* 2021;62(10):1220-1227.  
41 doi:10.1111/jcpp.13402  
42  
43 22. Riglin L, Eyre O, Thapar AK, et al. Identifying Novel Types of Irritability Using a  
44 Developmental Genetic Approach. *Am J Psychiatry.* 2019;176(8):635-642.  
45 doi:10.1176/appi.ajp.2019.18101134  
46  
47 23. Ebesutani C, Bernstein A, Nakamura BJ, Chorpita BF, Weisz JR. A Psychometric Analysis  
48 of the Revised Child Anxiety and Depression Scale—Parent Version in a Clinical Sample. *J*  
49 *Abnorm Child Psychol.* 2010;38(2):249-260. doi:10.1007/s10802-009-9363-8  
50  
51  
52  
53  
54  
55  
56  
57  
58  
59  
60  
61  
62  
63  
64  
65

- 1
- 2
- 3
- 4 24. Burton CL, Wright L, Shan J, et al. SWAN scale for ADHD trait-based genetic research: a
- 5 validity and polygenic risk study. *J Child Psychol Psychiatry*. 2019;60(9):988-997.
- 6 doi:10.1111/jcpp.13032
- 7
- 8
- 9 25. Yu C yun. *Evaluating Cutoff Criteria of Model Fit Indices for Latent Variable Models with*
- 10 *Binary and Continuous Outcomes.*; 2002.
- 11
- 12 26. Wolff HG, Preising K. Exploring item and higher order factor structure with the Schmid-
- 13 Leiman solution: Syntax codes for SPSS and SAS. *Behav Res Methods*. 2005;37(1):48-58.
- 14 doi:10.3758/BF03206397
- 15
- 16
- 17 27. Dunn TJ, Baguley T, Brunsden V. From alpha to omega: a practical solution to the
- 18 pervasive problem of internal consistency estimation. *Br J Psychol Lond Engl 1953*.
- 19 2014;105(3):399-412. doi:10.1111/bjop.12046
- 20
- 21
- 22 28. Watkins MW. The reliability of multidimensional neuropsychological measures: from alpha
- 23 to omega. *Clin Neuropsychol*. 2017;31(6-7):1113-1126.
- 24 doi:10.1080/13854046.2017.1317364
- 25
- 26
- 27 29. Flora DB. Your Coefficient Alpha Is Probably Wrong, but Which Coefficient Omega Is
- 28 Right? A Tutorial on Using R to Obtain Better Reliability Estimates. *Adv Methods Pract*
- 29 *Psychol Sci*. 2020;3(4):484-501. doi:10.1177/2515245920951747
- 30
- 31 30. Rodriguez A, Reise SP, Haviland MG. Applying Bifactor Statistical Indices in the
- 32 Evaluation of Psychological Measures. *J Pers Assess*. 2016;98(3):223-237.
- 33 doi:10.1080/00223891.2015.1089249
- 34
- 35
- 36 31. Rosseel Y. lavaan: An R Package for Structural Equation Modeling. *J Stat Softw*.
- 37 2012;48(1):1-36. doi:10.18637/jss.v048.i02
- 38
- 39
- 40 32. Steiner M, Grieder S. EFAtools: An R package with fast and flexible implementations of
- 41 exploratory factor analysis tools. *J Open Source Softw*. 2020;5(53):2521.
- 42 doi:10.21105/joss.02521
- 43
- 44 33. Hittner JB, May K, Silver NC. A Monte Carlo evaluation of tests for comparing dependent
- 45 correlations. *J Gen Psychol*. 2003;130(2):149-168. doi:10.1080/00221300309601282
- 46
- 47
- 48 34. Nimon K, Lewis M, Kane R, Haynes RM. An R package to compute commonality
- 49 coefficients in the multiple regression case: An introduction to the package and a practical
- 50 example. *Behav Res Methods*. 2008;40(2):457-466. doi:10.3758/BRM.40.2.457
- 51
- 52 35. Vittinghoff E, Glidden DV, Shiboski SC, McCulloch CE. Predictor Selection. In:
- 53 Vittinghoff E, Glidden DV, Shiboski SC, McCulloch CE, eds. *Regression Methods in*
- 54 *Biostatistics: Linear, Logistic, Survival, and Repeated Measures Models*. Statistics for
- 55 *Biology and Health*. Springer US; 2012:395-429. doi:10.1007/978-1-4614-1353-0\_10
- 56
- 57
- 58
- 59
- 60
- 61
- 62
- 63
- 64
- 65

1  
2  
3  
4  
5  
6  
7  
8  
9  
10  
11  
12  
13  
14  
15  
16  
17  
18  
19  
20  
21  
22  
23  
24  
25  
26  
27  
28  
29  
30  
31  
32  
33  
34  
35  
36  
37  
38  
39  
40  
41  
42  
43  
44  
45  
46  
47  
48  
49  
50  
51  
52  
53  
54  
55  
56  
57  
58  
59  
60  
61  
62  
63  
64  
65

36. Strout WF. A new item response theory modeling approach with applications to unidimensionality assessment and ability estimation. *Psychometrika*. 1990;55(2):293-325. doi:10.1007/BF02295289
37. Wiggins JL, Mitchell C, Stringaris A, Leibenluft E. Developmental trajectories of irritability and bidirectional associations with maternal depression. *J Am Acad Child Adolesc Psychiatry*. 2014;53(11):1191-1205, 1205.e1-4. doi:10.1016/j.jaac.2014.08.005

23 **Table 1:** Sample Characteristics

|                                            | <b>Parent-Report</b>        | <b>Self-Report</b>         |
|--------------------------------------------|-----------------------------|----------------------------|
|                                            | <b>Overall<br/>(N=3875)</b> | <b>Overall<br/>(N=516)</b> |
| Female (n, %)                              | 1882 (48.6%)                | 305 (59.1%)                |
| <b>Value</b>                               | Mean (SD)                   | Mean (SD)                  |
| <b>Age</b>                                 | 8.91 (2.29)                 | 15.2 (1.93)                |
| <b>Trait Measures</b>                      |                             |                            |
| Anxiety (N parent = 1554 ; N self = 109)   | 5.49 (4.46)                 | 12.2 (8.40)                |
| Depression (N parent = 1555, N self = 109) | 3.07 (3.10)                 | 9.38 (6.60)                |
| ADHD (N parent = 3867, N self = 516)       | -0.48 (0.99)                | -0.60 (0.92)               |

14  
15  
16  
17  
18  
19  
20 ODD (N parent = 1256, N self = 54) -0.18 (1.07) -0.64 (1.54)  
21  
22

23  
24 **TIDES-13 Dimensions**  
25

26  
27  
28 IRRIT -0.34 (1.16) -0.31 (1.14)  
29  
30

31  
32  
33 Ext. Reactivity -0.22 (1.13) -0.23 (1.14)  
34  
35

36  
37  
38 P. Anger -0.22 (1.33) -0.43 (1.38)  
39  
40

41  
42 R. Aggression -0.96 (1.42) -0.95 (1.38)  
43  
44

45  
46 Int. Reactivity 0.02 (1.22) 0.36 (1.32)  
47  
48

---

49  
50 **Notes:** ADHD = Attention-deficit/hyperactivity disorder, anxiety = Anxiety, depression  
51 = Depression, ODD = Oppositional Defiant Disorder, Ext. Reactivity = externalized  
52 Negative Emotional Reactivity sub-dimensions; R. Aggression = Reactive Aggression  
53 sub-dimensions; P. Anger = Proneness to Anger sub-dimension; Int. Reactivity =  
54 internalized Negative Emotional Reactivity; M = mean; SD = Standard Deviation,  
55 parent = parent-reported data, self = self-reported data.  
56  
57  
58  
59  
60  
61  
62  
63  
64  
65

---

14  
15  
16  
17  
18  
19  
20  
21  
22  
23  
24  
25  
26  
27  
28  
29  
30  
31  
32  
33  
34  
35  
36  
37  
38  
39  
40  
41  
42  
43  
44  
45  
46  
47  
48  
49  
50  
51  
52  
53  
54  
55  
56  
57  
58  
59  
60  
61  
62  
63  
64  
65

**Table 2:** Pearson correlations and 95 CI between TIDES sub-dimensions, ARI and other psychopathology.

|                    | IRRIT                | Ext.<br>Reactivity   | R.<br>Aggression     | P. Anger             | Int.<br>Reactivity   | ARI                  | ADHD                 | Anxiety              | Depression           | ODD                  |
|--------------------|----------------------|----------------------|----------------------|----------------------|----------------------|----------------------|----------------------|----------------------|----------------------|----------------------|
| IRRIT              | -                    | 0.93<br>[0.92, 0.93] | 0.90<br>[0.89, 0.9]  | 0.94<br>[0.94, 0.94] | 0.90<br>[0.89, 0.9]  | 0.68<br>[0.64, 0.71] | 0.42<br>[0.4, 0.45]  | 0.28<br>[0.24, 0.33] | 0.38<br>[0.34, 0.42] | 0.70<br>[0.67, 0.73] |
| Ext.<br>Reactivity | 0.89<br>[0.88, 0.91] | -                    | 0.76<br>[0.75, 0.77] | 0.82<br>[0.81, 0.83] | 0.80<br>[0.79, 0.81] | 0.60<br>[0.56, 0.64] | 0.40<br>[0.38, 0.43] | 0.28<br>[0.23, 0.32] | 0.36<br>[0.32, 0.4]  | 0.63<br>[0.59, 0.66] |
| R.<br>Aggression   | 0.92<br>[0.91, 0.93] | 0.80<br>[0.77, 0.83] | -                    | 0.80<br>[0.79, 0.81] | 0.69<br>[0.67, 0.71] | 0.59<br>[0.55, 0.64] | 0.37<br>[0.34, 0.4]  | 0.23<br>[0.19, 0.28] | 0.30<br>[0.25, 0.34] | 0.62<br>[0.59, 0.66] |
| P. Anger           | 0.95<br>[0.94, 0.96] | 0.76<br>[0.73, 0.80] | 0.86<br>[0.83, 0.88] | -                    | 0.83<br>[0.82, 0.84] | 0.66<br>[0.62, 0.69] | 0.40<br>[0.37, 0.43] | 0.21<br>[0.16, 0.25] | 0.33<br>[0.28, 0.37] | 0.70<br>[0.67, 0.72] |
| Int.<br>Reactivity | 0.84<br>[0.82, 0.87] | 0.63<br>[0.58, 0.68] | 0.65<br>[0.6, 0.69]  | 0.81<br>[0.78, 0.84] | -                    | 0.63<br>[0.59, 0.67] | 0.38<br>[0.35, 0.41] | 0.34<br>[0.29, 0.38] | 0.43<br>[0.39, 0.47] | 0.61<br>[0.58, 0.65] |
| ARI                | 0.77<br>[0.66, 0.85] | 0.49<br>[0.30, 0.65] | 0.70<br>[0.57, 0.8]  | 0.86<br>[0.78, 0.91] | 0.75<br>[0.63, 0.83] | -                    | 0.33<br>[0.26, 0.39] | 0.38<br>[0.32, 0.44] | 0.45<br>[0.4, 0.5]   | 0.59<br>[0.53, 0.65] |
| ADHD               | 0.54<br>[0.47, 0.59] | 0.52<br>[0.45, 0.58] | 0.50<br>[0.44, 0.56] | 0.48<br>[0.42, 0.55] | 0.42<br>[0.35, 0.49] | 0.24<br>[0.04, 0.43] | -                    | 0.54<br>[0.11, 0.21] | 0.52<br>[0.26, 0.35] | 0.48<br>[0.57, 0.63] |

|            |              |              |                     |                     |                     |                     |                     |                    |                      |              |
|------------|--------------|--------------|---------------------|---------------------|---------------------|---------------------|---------------------|--------------------|----------------------|--------------|
|            | 0.67         | 0.66         | 0.45                | 0.58                | 0.74                | 0.54                | 0.40 <sup>n.s</sup> |                    | 0.71                 | 0.18         |
| Anxiety    | [0.55, 0.76] | [0.54, 0.75] | [0.29, 0.59]        | [0.44, 0.69]        | [0.64, 0.81]        | [0.38, 0.67]        | [0.24, 0.54]        | -                  | [0.68, 0.73]         | [0.13, 0.24] |
|            | 0.30         | 0.31         | 0.03 <sup>n.s</sup> | 0.23 <sup>n.s</sup> | 0.54                | 0.20                | 0.32 <sup>n.s</sup> | 0.73               |                      | 0.33         |
| Depression | [0.12, 0.46] | [0.13, 0.47] | [-0.15, 0.22]       | [0.05, 0.4]         | [0.4, 0.66]         | [-0.01, 0.38]       | [0.15, 0.47]        | [0.64, 0.8]        | -                    | [0.28, 0.38] |
|            | 0.38         | 0.39         | 0.43                | 0.34                | 0.19 <sup>n.s</sup> | 0.23 <sup>n.s</sup> | 0.40                | 0.2 <sup>n.s</sup> | -0.06 <sup>n.s</sup> |              |
| ODD        | [0.12, 0.59] | [0.13, 0.59] | [0.19, 0.63]        | [0.08, 0.55]        | [-0.08, 0.44]       | [-0.12, 0.53]       | [0.24, 0.54]        | [-0.03, 0.44]      | [-0.3, 0.19]         | -            |

Notes: CI = Confidence Interval, n.s = not significant, IRRIT = Global Irritability dimension; Ext. Reactivity = externalized Negative Emotional Reactivity sub-dimension; R. Aggression = Reactive Aggression sub-dimension; P. Anger = Proneness to Anger sub-dimension; Int. Reactivity = internalized Negative Emotional Reactivity sub-dimension, ARI = Affective Reactivity Index, ADHD = Attention-Deficit / Hyperactivity Disorder traits, Anxiety = Anxiety traits, Depression = Depression traits, ODD = Oppositional Defiant Disorder traits, n.s = non-significant. Parent report data is above the diagonal and the self report data is below.



14  
15  
16  
17  
18  
19  
20  
21  
22  
23  
24  
25  
26  
27  
28  
29  
30  
31  
32  
33  
34  
35  
36  
37  
38  
39  
40  
41  
42  
43  
44  
45  
46  
47  
48  
49  
50  
51  
52  
53  
54  
55  
56  
57  
58  
59  
60  
61  
62  
63  
64  
65

**Table 3:** Schmid-Leiman Transformed Standardized factor loadings, Fit indices, and Reliability estimates of TIDES-13

| Tides Item                               | Parent Report (n = 1940) <sup>†</sup> |                 |               |          |                 | Self Report (n = 516) |                 |               |          |                 |
|------------------------------------------|---------------------------------------|-----------------|---------------|----------|-----------------|-----------------------|-----------------|---------------|----------|-----------------|
|                                          | IRRIT                                 | Ext. Reactivity | R. Aggression | P. Anger | Int. Reactivity | IRRIT                 | Ext. Reactivity | R. Aggression | P. Anger | Int. Reactivity |
| 8. Grumpy or Bad tempered                | 0.81                                  | 0.25            |               |          |                 | 0.78                  | 0.32            |               |          |                 |
| 10. Complains or whines                  | 0.72                                  | 0.22            |               |          |                 | 0.63                  | 0.26            |               |          |                 |
| 11. Irritable during body discomfort     | 0.74                                  | 0.23            |               |          |                 | 0.58                  | 0.24            |               |          |                 |
| 7. Angry when not getting what they want | 0.83                                  | 0.26            |               |          |                 | 0.72                  | 0.30            |               |          |                 |
| 9. Explosive                             | 0.73                                  |                 | 0.44          |          |                 | 0.67                  |                 | 0.32          |          |                 |

14  
15  
16  
17  
18  
19  
20  
21  
22  
23  
24  
25  
26  
27  
28  
29  
30  
31  
32  
33  
34  
35  
36  
37  
38  
39  
40  
41  
42  
43  
44  
45  
46  
47  
48  
49  
50  
51  
52  
53  
54  
55  
56  
57  
58  
59  
60  
61  
62  
63  
64  
65

|                            |      |      |      |      |      |
|----------------------------|------|------|------|------|------|
| 12. Physically aggressive  | 0.80 | 0.48 |      | 0.78 | 0.37 |
| 13. Verbally offensive     | 0.73 | 0.44 |      | 0.61 | 0.29 |
| 1. Gets Angry              | 0.87 | 0.19 |      | 0.76 | 0.24 |
| 2. Temper Tantrums         | 0.89 | 0.20 |      | 0.81 | 0.25 |
| 5. Loose temper            | 0.91 | 0.20 |      | 0.87 | 0.27 |
| 3. Easily frustrated       | 0.80 |      | 0.33 | 0.73 | 0.46 |
| 4. Annoyed by minor things | 0.82 |      | 0.34 | 0.71 | 0.45 |
| 6. Annoyed by others       | 0.89 |      | 0.32 | 0.68 | 0.42 |
| <b>Fit Indices</b>         |      |      |      |      |      |
| CFI                        | 0.97 |      |      | 0.96 |      |

14  
15  
16  
17  
18  
19  
20  
21  
22  
23  
24  
25  
26  
27  
28  
29  
30  
31  
32  
33  
34  
35  
36  
37  
38  
39  
40  
41  
42  
43  
44  
45  
46  
47  
48  
49  
50  
51  
52  
53  
54  
55  
56  
57  
58  
59  
60  
61  
62  
63  
64  
65

|       |      |  |  |  |  |      |  |  |  |  |
|-------|------|--|--|--|--|------|--|--|--|--|
| TLI   | 0.97 |  |  |  |  | 0.96 |  |  |  |  |
| RMSEA | 0.76 |  |  |  |  | 0.78 |  |  |  |  |
| SRMR  | 0.03 |  |  |  |  | 0.04 |  |  |  |  |

**Reliability  
Indices**

|                                 |      |      |      |      |      |      |      |      |      |      |
|---------------------------------|------|------|------|------|------|------|------|------|------|------|
| $\omega_{\text{Total}}$         | 0.97 | 0.88 | 0.91 | 0.94 | 0.90 | 0.95 | 0.83 | 0.81 | 0.89 | 0.87 |
| $\omega_{\text{Hierarchical}}$  | 0.94 | 0.81 | 0.67 | 0.89 | 0.77 | 0.90 | 0.71 | 0.66 | 0.81 | 0.63 |
| $\omega_{\text{sub-dimension}}$ |      | 0.08 | 0.25 | 0.04 | 0.13 |      | 0.12 | 0.15 | 0.08 | 0.24 |

---

Notes: IRRIT = Global Irritability dimension; Ext. Reactivity = externalized Negative Emotional Reactivity sub-dimension; R. Aggression = Reactive Aggression sub-dimension; P. Anger = Proneness to Anger sub-dimension; Int. Reactivity = internalized Negative Emotional Reactivity sub-dimension; CFI = comparative fit index; TLI = Tucker Lewis Index; RMSEA = root mean square error of approximation; † the parameters in this table were calculated by transforming the loadings from the best fitting factor model in confirmatory factor analysis so only the confirmatory parent sample was used.

**Table 4:** Multiple regression results of associations between TIDES sub-dimensions with Anxiety, Depression, ODD, and ADHD traits.

| DV                   | IV                     | Parent Report             |                          |                           | Self Report               |                    |               |                      |                         |                         |
|----------------------|------------------------|---------------------------|--------------------------|---------------------------|---------------------------|--------------------|---------------|----------------------|-------------------------|-------------------------|
|                      |                        | B [95 CI]                 | Model R <sup>2</sup> (%) | Unique R <sup>2</sup> (%) | Shared R <sup>2</sup> (%) | B                  | 95 CI         | Model R <sup>2</sup> | % Unique R <sup>2</sup> | % Shared R <sup>2</sup> |
| <i>Internalizing</i> |                        |                           |                          |                           |                           |                    |               |                      |                         |                         |
| Anxiety traits       | Ext. Reactivity        | 0.45* [0.05, 0.79]        |                          | 2.2                       |                           | 0.44               | [-1.74, 2.61] |                      | 1.2                     |                         |
|                      | R. Aggression          | 0.17 [-0.09, 0.34]        |                          | 0.7                       |                           | 0.47               | [-1.42, 2.36] |                      | 0.1                     |                         |
|                      | P. Anger               | -0.69*** [-1.07, -0.34]   |                          | 6.4                       |                           | -1.55              | [-3.42, 0.32] |                      | 9.3                     |                         |
|                      | <b>Int. Reactivity</b> | <b>1.45***</b> [1.2, 1.8] |                          | 32                        |                           | <b>3.47**</b><br>* | [1.42, 5.36]  |                      | 62.1                    |                         |
|                      |                        |                           | 13.1                     |                           |                           |                    |               |                      | 41.5                    | 16.7                    |

14  
15  
16  
17  
18  
19  
20  
21  
22  
23  
24  
25  
26  
27  
28  
29  
30  
31  
32  
33  
34  
35  
36  
37  
38  
39  
40  
41  
42  
43  
44  
45  
46  
47  
48  
49  
50  
51  
52  
53  
54  
55  
56  
57  
58  
59  
60  
61  
62  
63  
64  
65

Depression  
traits

Ext.  
Reactivity  
  
R.  
Aggression  
  
P. Anger  
  
**Int.**  
**Reactivity**

0.33 [-0.3, 0.46]  
  
0.20\* [0.05, 0.37]  
  
-0.32\*\* [-0.60, -0.11]  
  
**0.92\*\*\*** [0.84, 1.3]

0.9  
  
1.9  
  
2.4  
  
23.9

0.27 [-1.48, 2.02]  
  
0.12 [-1.40, 1.64]  
  
-0.61 [-2.12, 0.89]  
  
**2.04\*\*** [0.68, 3.40]

3.0  
  
1.9  
  
3.3  
  
58.1

20.5

54.4

16

*Externalizing*

ODD traits

Ext.  
Reactivity  
  
R.  
Aggression  
  
**P. Anger**  
  
Int.  
Reactivity

0.1\*\*\* [0.06, 0.22]  
  
0.1\*\*\* [0.09, 0.19]  
  
**0.26\*\*\*** [0.20, 0.35]  
  
0.14\*\*\* [-0.05, 0.10]

1.2  
  
2.8  
  
5.0  
  
0.0

0.51 [0.01, 1.01]  
  
0.17 [-0.27, 0.61]  
  
0.20 [0.32, 0.72]  
  
-0.27 [-0.73, 0.19]

19.9  
  
3.2  
  
5.0  
  
10.3

44.1

61.2

31.2

14  
15  
16  
17  
18  
19  
20  
21  
22  
23  
24  
25  
26  
27  
28  
29  
30  
31  
32  
33  
34  
35  
36  
37  
38  
39  
40  
41  
42  
43  
44  
45  
46  
47  
48  
49  
50  
51  
52  
53  
54  
55  
56  
57  
58  
59  
60  
61  
62  
63  
64  
65

|             |                   |                |              |      |       |               |      |
|-------------|-------------------|----------------|--------------|------|-------|---------------|------|
| ADHD traits | <b>Ext.</b>       | <b>0.16***</b> | [0.08, 0.18] | 2.8  | 0.01  | [-0.01, 0.21] | 5.2  |
|             | <b>Reactivity</b> |                |              |      |       |               |      |
|             | R.                | 0.08***        | [0.06, 0.13] | 2.8  | 0.10* | [0.01,0.18]   | 4.9  |
|             | Aggression        |                |              |      |       |               |      |
|             | P. Anger          | 0.0            | [0.01, 0.11] | 0.61 | 0.07  | [-0.03, 0.17] | 2.0  |
|             | Int.              | 0.1***         | [0.06, 0.15] | 1.8  | 0.04  | [-0.05, 0.13] | 0.9  |
|             | Reactivity        |                |              |      |       |               |      |
|             |                   |                |              | 23.6 |       |               | 61.7 |
|             |                   |                |              |      |       |               | 48.8 |

---

Notes: DV = Dependent Variable, IV = Independent Variable, B = Beta coefficient, CI = Confidence Interval, Ext. Reactivity = Externalized Negative Emotional Reactivity sub-dimension; R. Aggression = Reactive Aggression sub-dimension; P. Anger = Proneness to Anger sub-dimension; Int. Reactivity = Internalized Negative Emotional Reactivity sub-dimension; Model R<sup>2</sup>= percentage of the dependent variable’s variance explained by the overall model. % Unique R<sup>2</sup> = percentage of the variance explained by the model that is unique to each corresponding sub-dimension; % Shared R<sup>2</sup> = ercentage of the variance explained by the model that is common to all sub-dimensions, and therefore represents the global irritability dimension. \*p<0.05; \*\*p<0.01; \*\*\*p<0.001. The strongest significant predictor of a given trait is bolded.

14  
15  
16  
17  
18  
19  
20  
21  
22  
23  
24  
25  
26  
27  
28  
29  
30  
31  
32  
33  
34  
35  
36  
37  
38  
39  
40  
41  
42  
43  
44  
45  
46  
47  
48  
49  
50  
51  
52  
53  
54  
55  
56  
57  
58  
59  
60  
61  
62  
63  
64  
65

### Figure Captions

**Figure 1: Higher Order Model of Irritability and Factor loadings.** Both parent-reported (A) and self-reported (B) The Irritability and Dysregulation of Emotion Scale (TIDES-13) scores showed a higher order model of irritability with a global irritability dimension (IRRIT) and externalized negative emotional reactivity (Ext. Reactivity), reactive aggression (R. Aggression), proneness to anger (P. Anger), internalized negative emotional reactivity (Int. Reactivity). The numbers on the straight lines represent the standardized loading. The numbers placed around the circular arrows represents the corresponding variable's variance.

## A: Parent Report

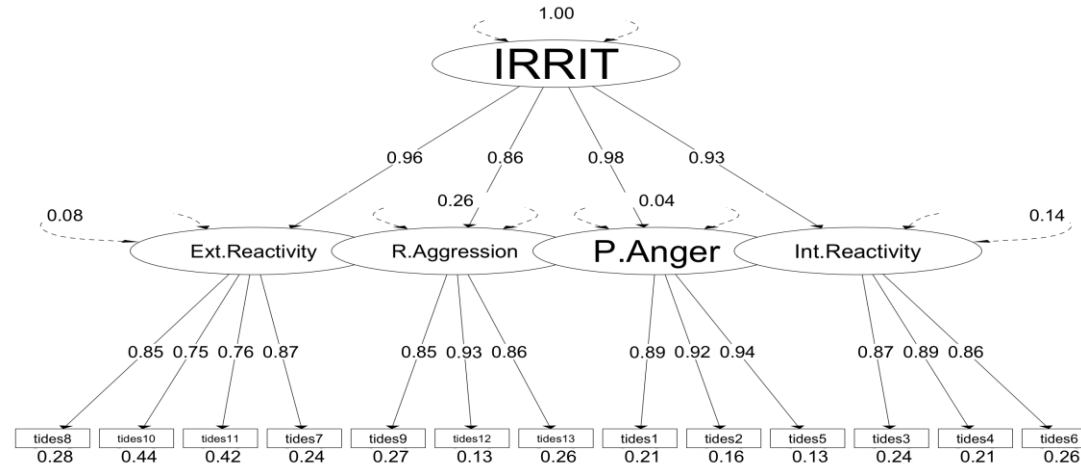

## B: Self Report

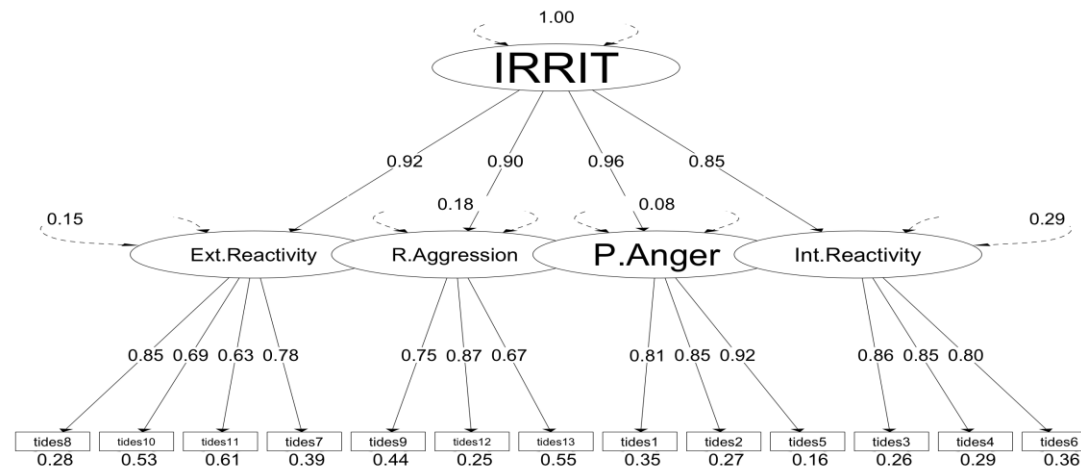



## Supplementary material

Table S1: CFA Model Fit indices

| Model          | Parent Report |       |       |       | Self Report |       |       |       |
|----------------|---------------|-------|-------|-------|-------------|-------|-------|-------|
|                | CFI           | TLI   | RMSEA | SRMR  | CFI         | TLI   | RMSEA | SRMR  |
| Unidimensional | 0.902         | 0.899 | 0.139 | 0.047 | 0.883       | 0.859 | 0.125 | 0.058 |
| 2 Dimension    | 0.947         | 0.935 | 0.1   | 0.033 | 0.9         | 0.878 | 0.116 | 0.054 |
| 3 Dimension    | 0.964         | 0.954 | 0.087 | 0.031 | 0.939       | 0.921 | 0.096 | 0.054 |
| 4 Dimension    | .979†         | .972† | .068† | .023† | .966†       | .955† | .070† | .040† |
| H 2 Dimension  | 0.95          | 0.939 | 0.101 | 0.033 | 0.9         | 0.877 | 0.117 | 0.054 |
| H 3 Dimension  | 0.962         | 0.952 | 0.088 | 0.030 | 0.929       | 0.911 | 0.099 | 0.051 |
| H 4 Dimension  | 0.972         | 0.964 | 0.076 | 0.028 | 0.957       | 0.944 | 0.078 | 0.044 |

Notes: CFA = confirmatory factor analysis; CFI = comparative fit index; TLI = tucker lewis index; RMSEA = root mean square error of approximation; SRMR = standardised root mean residual; H = higher order model with additional higher order global dimensions, † = best fitting model. This table summarizes the confirmatory factor analysis fit indices of multiple factor models extracted from exploratory factor analysis conducted in a separate exploratory sample.

**Table S2:** Associations of TIDES sub-dimensions with Age and Gender

|                   |  | <i>Dependent variable:</i>   |                           |                        |                              |                   |                          |                              |                             |                  |                                  |                             |                                  |                              |                           |                                  |
|-------------------|--|------------------------------|---------------------------|------------------------|------------------------------|-------------------|--------------------------|------------------------------|-----------------------------|------------------|----------------------------------|-----------------------------|----------------------------------|------------------------------|---------------------------|----------------------------------|
|                   |  | IRRIT                        |                           |                        | P. Anger                     |                   |                          | Int. Reactivity              |                             |                  | Ext. Reactivity                  |                             |                                  | R. Aggression                |                           |                                  |
|                   |  | Beta<br>(Std. Error)         |                           |                        | Beta<br>(Std. Error)         |                   |                          | Beta<br>(Std. Error)         |                             |                  | Beta<br>(Std. Error)             |                             |                                  | Beta<br>(Std. Error)         |                           |                                  |
| Sample            |  | Overall                      | Female                    | Male                   | Overall                      | Female            | Male                     | Overall                      | Female                      | Male             | Overall                          | Female                      | Male                             | Overall                      | Female                    | Male                             |
| Age               |  | 0.015<br>(0.010)             | 0.003<br>(0.011)          | -<br><b>0.028</b><br>* | 0.007<br>(0.011)             | -0.011<br>(0.012) | -<br><b>0.045</b><br>*** | 0.045***<br>(0.010)          | <b>0.033</b> **<br>(0.011)  | 0.010<br>(0.012) | 0.009<br>(0.010)                 | -0.005<br>(0.011)           | -<br><b>0.041</b> ***<br>(0.011) | 0.002<br>(0.012)             | -0.003<br>(0.013)         | -<br><b>0.050</b> ***<br>(0.013) |
|                   |  |                              |                           | (0.011)                |                              |                   | (0.011)                  |                              |                             | (0.012)          |                                  |                             | (0.011)                          |                              |                           | (0.013)                          |
|                   |  |                              |                           | 1)                     |                              |                   | 2)                       |                              |                             |                  |                                  |                             |                                  |                              |                           |                                  |
| <b>Gender</b>     |  |                              |                           |                        |                              |                   |                          |                              |                             |                  |                                  |                             |                                  |                              |                           |                                  |
| Female            |  | ref.                         |                           |                        | ref.                         |                   |                          | ref.                         |                             |                  | ref.                             |                             |                                  | ref.                         |                           |                                  |
| Male              |  | <b>0.676</b> ***<br>(0.117)  |                           |                        | <b>0.733</b> ***<br>(0.129)  |                   |                          | <b>0.045</b> ***<br>(0.124)  |                             |                  | <b>0.641</b> ***<br>(0.117)      |                             |                                  | <b>0.814</b> ***<br>(0.142)  |                           |                                  |
| <b>Respondent</b> |  |                              |                           |                        |                              |                   |                          |                              |                             |                  |                                  |                             |                                  |                              |                           |                                  |
| Parent            |  | ref.                         |                           |                        | ref.                         |                   |                          | ref.                         |                             |                  | ref.                             |                             |                                  | ref.                         |                           |                                  |
| Self              |  | 0.080<br>(0.072)             | <b>0.232</b> *<br>(0.095) | -<br>0.098<br>(0.108)  | -0.082<br>(0.080)            | 0.056<br>(0.106)  | -<br><b>0.245</b><br>*   | 0.199**<br>(0.076)           | <b>0.360</b> ***<br>(0.100) | 0.010<br>(0.116) | 0.313***<br>(0.072)              | <b>0.490</b> ***<br>(0.096) | 0.105<br>(0.108)                 | 0.172*<br>(0.087)            | <b>0.234</b> *<br>(0.116) | 0.099<br>(0.132)                 |
|                   |  |                              |                           | 8)                     |                              |                   | 0)                       |                              |                             |                  |                                  |                             |                                  |                              |                           |                                  |
| Age:Gender        |  | <b>-0.055</b> ***<br>(0.012) |                           |                        | <b>-0.055</b> ***<br>(0.013) |                   |                          | <b>-0.048</b> ***<br>(0.012) |                             |                  | -<br><b>0.063</b> ***<br>(0.012) |                             |                                  | <b>-0.057</b> ***<br>(0.014) |                           |                                  |

---

*Notes: Ext. Reactivity = Externalized Negative Emotional Reactivity sub-dimension; R. AGGR = Reactive Aggression sub-dimension; P. Anger = Proneness to Anger sub-dimension; Int. Reactivity = Internalized Negative Emotional Reactivity sub-dimension, Std. Error = standard error, ref = reference category for categorical variables. Beta coefficients estimated for categorical variables are in comparison to the reference category. \*p<0.05; \*\*p<0.01; \*\*\*p<0.001. This table summarizes the results from multiple regression analyses examining the association between TIDES-13 sub-dimensions with age and gender. Gender-stratified analyses were undertaken when the Age: Gender interaction term was significant.*

## **TIDES-13 Development**

We began by reviewing the existing definitions of irritability and identifying components within these definitions including proneness to anger (phasic irritability), negative emotional reactivity, grumpy or grouchy mood (tonic irritability), and reactive aggression. We then created a large pool of candidate items corresponding to these five components from existing irritability measures. Responses were measured from strengths (-3) to weakness (3) to capture the full distribution of irritability in a general population sample. The existing item pool was administered to a development sample consisting of parents of children attending a psychiatric clinic at [XXXXXXXXXX] Hospital (n = 149). Parents responding to the items were asked a list of qualitative questions probing their interpretations of each item. These results informed item modification and deletion. Items were further deleted based on low item-scale correlation, low contributions to internal consistency, and considerations of face validity. After these final modifications, we arrived at the 13-item scale used in this present study. TIDES-13 has two parts: the first is 13-item measure of irritability traits on a continuum, where parents/youth were asked to rate the participant/themselves compared to others of the same age over the past year on a 7-point Likert scale ranging from -3 (far less than others) to 3 (far more than others). The second part of the scale contains four additional items measuring the frequency of temper outbursts, frequency of physically aggressive outbursts and level of the irritability-related impairment, all of which correspond to DSM-5 criterion for DMDD and IED to aid in establishing research diagnoses.

### **Exploratory Factor Analysis (EFA) Methods**

In EFA, the number of factors to retain was informed by parallel analyses and the scree test. EFA models were extracted using varimax rotations in anticipation of highly correlated factors. We assigned items to factors when the factor loading was greater than 0.4. All EFA analysis was conducted using the stats package that runs freely in R studio.

### **Exploratory Factor Analysis Results:**

Parallel analysis suggested extracting four factors, however visual examination of the scree plot for “elbowing” was not clearly distinguishable between two, three and four-factor solutions so we extracted all one through four- factor solutions to determine the number of sub-dimensions that best described TIDES-13-dimensional structure. The first was a unidimensional model with all items loading onto one latent variable. The two-factor model had two factors: Reactive Aggression and the remaining items. The three-factor model had mood, phasic, and reactive aggression factors. The four-factor factor model had externalized negative emotional reactivity (Ext. Reactivity), reactive aggression (R. Aggr), proneness to anger (P. Anger), internalized negative emotional reactivity (Int. Reactivity) factors.
